# Supplementary material for: Structural diversity of ethylzinc derivatives of 3,5-substituted pyrazoles
Source: Royal Society of Chemistry journal article supplement (doi:10.1039/d0dt03026k), 2020-01-01
Supplement: d0dt03026k1.pdf [file d0dt03026k1.pdf]

## Structural diversity of ethylzinc derivatives of 3,5-substituted pyrazoles

Szymon Komorski,<sup>†</sup> Michał K. Leszczyński,<sup>†,‡</sup> Iwona Justyniak,<sup>‡</sup> and Janusz Lewiński\*,<sup>†,‡</sup>

<sup>†</sup> Warsaw University of Technology, Faculty of Chemistry, Noakowskiego 3, 00-664 Warsaw, Poland

<sup>‡</sup> Polish Academy of Sciences, Institute of Physical Chemistry, Kasprzaka 44/52, 01-224 Warsaw, Poland

|                                                                                                                                    |      |
|------------------------------------------------------------------------------------------------------------------------------------|------|
| Contents: .....                                                                                                                    | Page |
| 1. X-ray structure determination.....                                                                                              | 2    |
| 2. <sup>1</sup> H NMR, <sup>13</sup> C NMR and [ <sup>1</sup> H- <sup>13</sup> C] HMQC NMR spectra of compounds <b>1 – 6</b> ..... | 15   |
| 3. DOSY NMR data processing description.....                                                                                       | 24   |
| 4. References .....                                                                                                                | 25   |

## X-ray structure determination

The crystals were selected under Paratone-N oil, mounted on the nylon loops and positioned in the cold stream on the diffractometer. The X-ray data for complexes **1,2,3** and **6** were collected at 100(2)K on a SuperNova Agilent diffractometer using graphite monochromated MoK $\alpha$  radiation ( $\lambda = 0.71073 \text{ \AA}$ ). The data were processed with *CrysAlisPro*.<sup>1</sup> The X-ray data for complexes **4** and **5** were collected on a Nonius Kappa CCD diffractometer using graphite monochromated MoK $\alpha$  radiation ( $\lambda = 0.71073 \text{ \AA}$ ). The data were processed with *DENZO* and *SCALEPACK (HKL2000 package)*.<sup>2</sup> The structures were solved by direct methods using the SHELXS-97 program and were refined by full matrix least-squares on F<sup>2</sup> using the program SHELXL.<sup>3</sup> All non-hydrogen atoms were refined with anisotropic displacement parameters. Hydrogen atoms were added to the structure model at geometrically idealized coordinates and refined as riding atoms. Crystallographic data (excluding structure factors) for the structure reported in this paper have been deposited with the Cambridge Crystallographic Data Centre as supplementary publication. Copies of the data can be obtained free of charge on application to CCDC, 12 Union Road, Cambridge CB21EZ, UK (fax: (+44)1223-336-033; e-mail: [deposit@ccdc.cam.ac.uk](mailto:deposit@ccdc.cam.ac.uk)). CCDC: 2025235 (**1**), 2025236 (**2**), 2025237 (**3**), 2025238 (**4**), 2025239 (**5**) and 2025240 (**6**).

### Crystal data and structure refinement for 1•PhMe

|                                   |                                                                                |                |
|-----------------------------------|--------------------------------------------------------------------------------|----------------|
| Empirical formula                 | C <sub>49</sub> H <sub>76</sub> N <sub>12</sub> O <sub>2</sub> Zn <sub>4</sub> |                |
| Formula weight                    | 1126.69                                                                        |                |
| Temperature                       | 100(2) K                                                                       |                |
| Wavelength                        | 0.71073 Å                                                                      |                |
| Crystal system                    | Monoclinic                                                                     |                |
| Space group                       | P 21/n                                                                         |                |
| Unit cell dimensions              | a = 8.1493(2) Å                                                                | a = 90°        |
|                                   | b = 17.0654(5) Å                                                               | b = 98.620(2)° |
|                                   | c = 19.1930(4) Å                                                               | g = 90°        |
| Volume                            | 2639.04(12) Å <sup>3</sup>                                                     |                |
| Z                                 | 2                                                                              |                |
| Density (calculated)              | 1.418 Mg/m <sup>3</sup>                                                        |                |
| Absorption coefficient            | 1.845 mm <sup>-1</sup>                                                         |                |
| F(000)                            | 1180                                                                           |                |
| Crystal size                      | 0.26 x 0.18 x 0.09 mm <sup>3</sup>                                             |                |
| Theta range for data collection   | 2.891 to 29.510°                                                               |                |
| Index ranges                      | -11 ≤ h ≤ 10, -22 ≤ k ≤ 23, -21 ≤ l ≤ 25                                       |                |
| Reflections collected             | 14293                                                                          |                |
| Independent reflections           | 6309 [R(int) = 0.0514]                                                         |                |
| Completeness to theta = 25.242°   | 99.8 %                                                                         |                |
| Absorption correction             | Semi-empirical from equivalents                                                |                |
| Max. and min. transmission        | 0.847 and 0.678                                                                |                |
| Refinement method                 | Full-matrix least-squares on F <sup>2</sup>                                    |                |
| Data / restraints / parameters    | 6309 / 42 / 329                                                                |                |
| Goodness-of-fit on F <sup>2</sup> | 1.041                                                                          |                |
| Final R indices [I > 2σ(I)]       | R1 = 0.0409, wR2 = 0.0844                                                      |                |
| R indices (all data)              | R1 = 0.0610, wR2 = 0.0916                                                      |                |
| Largest diff. peak and hole       | 0.547 and -0.542 e.Å <sup>-3</sup>                                             |                |

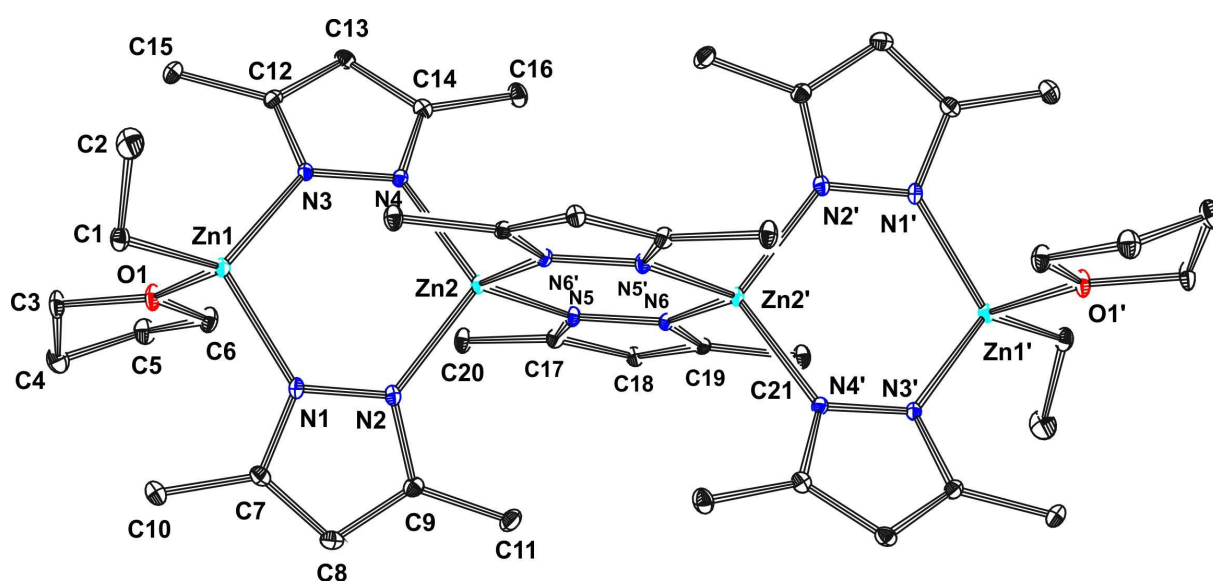

**Figure S1.** Molecular structure of **1** with thermal ellipsoids set at 35% probability. Hydrogen atoms have been omitted for clarity. Symmetry transformations used to generate equivalent atoms:  $(-x, -y, -z)$ .

**Table S1.** Selected bond lengths [Å] and angles [°] for **1**•PhMe

|           |            |                |            |
|-----------|------------|----------------|------------|
| C1 – Zn1  | 1.990(3)   | O1 – Zn1 – N1  | 92.20(8)   |
| O1 – Zn1  | 2.2131(19) | O1 – Zn1 – N3  | 91.95(8)   |
| N1 – Zn1  | 2.006(2)   | C1 – Zn1 – N1  | 124.46(10) |
| N3 – Zn1  | 2.014(2)   | C1 – Zn1 – N3  | 124.85(11) |
| N2 – Zn2  | 2.003(2)   | C1 – Zn1 – O1  | 107.90(10) |
| N4 – Zn2  | 2.008(2)   | N1 – Zn1 – N3  | 104.78(9)  |
| N5 – Zn2  | 1.995(2)   | N2 – Zn2 – N5  | 107.32(9)  |
| N6' – Zn2 | 2.002(2)   | N2 – Zn2 – N4  | 106.79(9)  |
| N1 – N2   | 1.382(3)   | N2 – Zn2 – N6' | 110.58(9)  |
| N3 – N4   | 1.382(3)   | N4 – Zn2 – N6' | 113.00(9)  |
| N5 – N6   | 1.378(3)   | N4 – Zn2 – N5  | 110.74(8)  |
|           |            | N5 – Zn2 – N6' | 108.28(8)  |

## Crystal data and structure refinement for **2**

|                                   |                                                                                                                     |
|-----------------------------------|---------------------------------------------------------------------------------------------------------------------|
| Empirical formula                 | $C_{32}H_{54}N_8O_2Zn_3$                                                                                            |
| Formula weight                    | 778.94                                                                                                              |
| Temperature                       | 100(2) K                                                                                                            |
| Wavelength                        | 0.71073 Å                                                                                                           |
| Crystal system                    | Monoclinic                                                                                                          |
| Space group                       | P 21/c                                                                                                              |
| Unit cell dimensions              | $a = 7.7664(3)$ Å $a = 90^\circ$<br>$b = 29.8024(12)$ Å $b = 102.299(4)^\circ$<br>$c = 16.0219(6)$ Å $g = 90^\circ$ |
| Volume                            | $3623.3(2)$ Å <sup>3</sup>                                                                                          |
| Z                                 | 4                                                                                                                   |
| Density (calculated)              | 1.428 Mg/m <sup>3</sup>                                                                                             |
| Absorption coefficient            | 2.010 mm <sup>-1</sup>                                                                                              |
| F(000)                            | 1632                                                                                                                |
| Crystal size                      | 0.27 x 0.22 x 0.09 mm <sup>3</sup>                                                                                  |
| Theta range for data collection   | 3.028 to 28.598°                                                                                                    |
| Index ranges                      | $-9 \leq h \leq 9$ , $-39 \leq k \leq 37$ , $-19 \leq l \leq 20$                                                    |
| Reflections collected             | 17361                                                                                                               |
| Independent reflections           | 8162 [R(int) = 0.0234]                                                                                              |
| Completeness to theta = 26.242°   | 99.8 %                                                                                                              |
| Absorption correction             | Semi-empirical from equivalents                                                                                     |
| Max. and min. transmission        | 0.835 and 0.594                                                                                                     |
| Refinement method                 | Full-matrix least-squares on F <sup>2</sup>                                                                         |
| Data / restraints / parameters    | 8162 / 0 / 416                                                                                                      |
| Goodness-of-fit on F <sup>2</sup> | 1.051                                                                                                               |
| Final R indices [I > 2σ(I)]       | R1 = 0.0296, wR2 = 0.0629                                                                                           |
| R indices (all data)              | R1 = 0.0379, wR2 = 0.0654                                                                                           |
| Largest diff. peak and hole       | 0.483 and -0.366 e. Å <sup>-3</sup>                                                                                 |

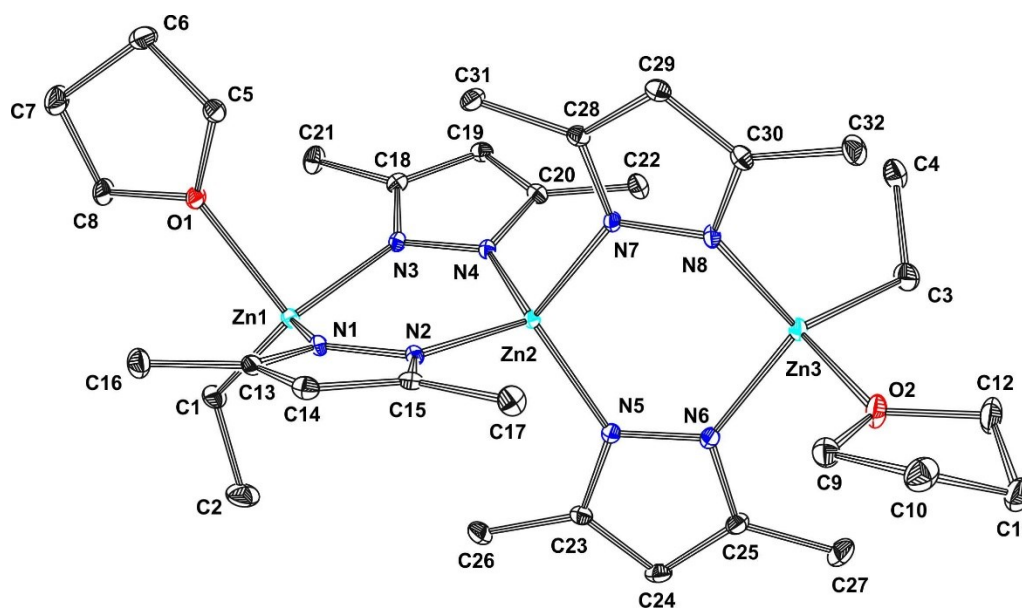

**Figure S2.** Molecular structure of **2** with thermal ellipsoids set at 35% probability. Hydrogen atoms have been omitted for clarity.

**Table S2.** Selected bond lengths [Å] and angles [°] for **2**

|          |            |               |           |
|----------|------------|---------------|-----------|
| C1 – Zn1 | 1.991(2)   | O1 – Zn1 – N1 | 96.46(6)  |
| O1 – Zn1 | 2.1849(14) | O1 – Zn1 – N3 | 94.73(6)  |
| N1 – Zn1 | 2.0123(16) | C1 – Zn1 – N1 | 124.75(8) |
| N3 – Zn1 | 2.0185(17) | C1 – Zn1 – N3 | 124.74(8) |
| N2 – Zn2 | 1.9788(16) | C1 – Zn1 – O1 | 101.59(8) |
| N4 – Zn2 | 1.9886(15) | N1 – Zn1 – N3 | 104.87(6) |
| N5 – Zn2 | 1.9793(17) | N2 – Zn2 – N4 | 108.53(7) |
| N7 – Zn2 | 1.9940(16) | N2 – Zn2 – N5 | 110.97(7) |
| C3 – Zn3 | 1.991(2)   | N2 – Zn2 – N7 | 106.50(7) |
| O2 – Zn3 | 2.1908(14) | N4 – Zn2 – N5 | 115.52(7) |
| N6 – Zn3 | 2.0118(17) | N4 – Zn2 – N7 | 105.44(7) |
| N8 – Zn3 | 2.0196(17) | N5 – Zn2 – N7 | 109.37(7) |
| N1 – N2  | 1.378(2)   | O2 – Zn3 – N6 | 96.69(6)  |
| N3 – N4  | 1.377(2)   | O2 – Zn3 – N8 | 96.88(6)  |
| N5 – N6  | 1.377(2)   | C3 – Zn3 – N6 | 126.09(9) |
| N7 – N8  | 1.375(2)   | C3 – Zn3 – N8 | 120.29(9) |
|          |            | C3 – Zn3 – O2 | 103.88(8) |
|          |            | N6 – Zn3 – N8 | 105.56(7) |

### Crystal data and structure refinement for **3**

|                                   |                                                                |                |
|-----------------------------------|----------------------------------------------------------------|----------------|
| Empirical formula                 | C <sub>40</sub> H <sub>70</sub> N <sub>8</sub> Zn <sub>3</sub> |                |
| Formula weight                    | 859.21                                                         |                |
| Temperature                       | 100(2) K                                                       |                |
| Wavelength                        | 0.71073 Å                                                      |                |
| Crystal system                    | Monoclinic                                                     |                |
| Space group                       | P 21/n                                                         |                |
| Unit cell dimensions              | a = 14.0604(4) Å                                               | a = 90°        |
|                                   | b = 18.0359(6) Å                                               | b = 92.433(3)° |
|                                   | c = 17.1111(6) Å                                               | g = 90°        |
| Volume                            | 4335.3(2) Å <sup>3</sup>                                       |                |
| Z                                 | 4                                                              |                |
| Density (calculated)              | 1.316 Mg/m <sup>3</sup>                                        |                |
| Absorption coefficient            | 1.683 mm <sup>-1</sup>                                         |                |
| F(000)                            | 1824                                                           |                |
| Crystal size                      | 0.26 x 0.16 x 0.12 mm <sup>3</sup>                             |                |
| Theta range for data collection   | 2.960 to 27.000°.                                              |                |
| Index ranges                      | -17 ≤ h ≤ 17, -23 ≤ k ≤ 22, -21 ≤ l ≤ 21                       |                |
| Reflections collected             | 24508                                                          |                |
| Independent reflections           | 9372 [R(int) = 0.0544]                                         |                |
| Completeness to theta = 25.242°   | 99.8 %                                                         |                |
| Absorption correction             | Semi-empirical from equivalents                                |                |
| Max. and min. transmission        | 0.818 and 0.733                                                |                |
| Refinement method                 | Full-matrix least-squares on F <sup>2</sup>                    |                |
| Data / restraints / parameters    | 9372 / 0 / 478                                                 |                |
| Goodness-of-fit on F <sup>2</sup> | 1.053                                                          |                |
| Final R indices [I > 2σ(I)]       | R1 = 0.0475, wR2 = 0.1028                                      |                |
| R indices (all data)              | R1 = 0.0799, wR2 = 0.1212                                      |                |
| Largest diff. peak and hole       | 0.951 and -0.756 e.Å <sup>-3</sup>                             |                |

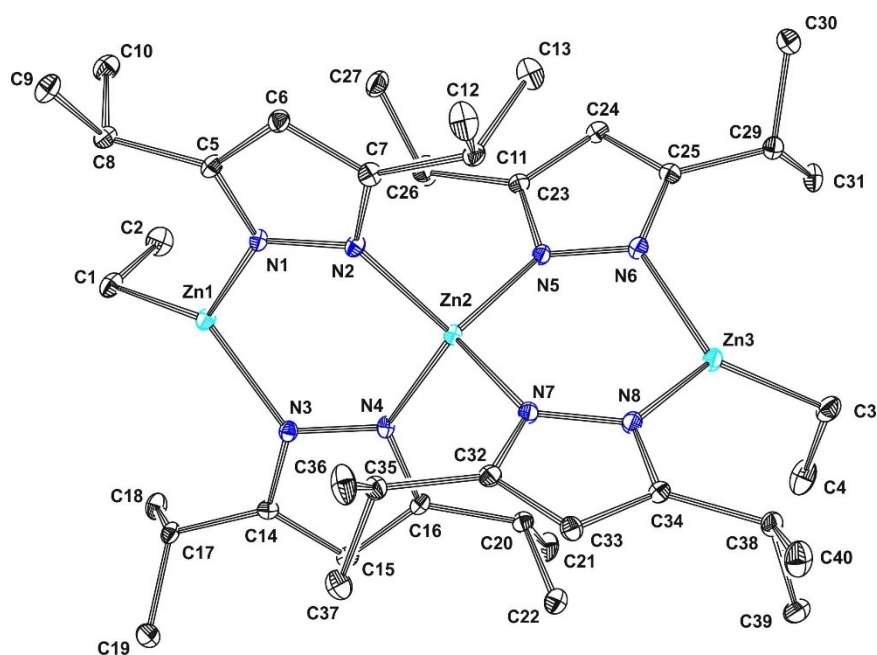

**Figure S3.** Molecular structure of **3** with thermal ellipsoids set at 35% probability. Hydrogen atoms have been omitted for clarity.

**Table S3.** Selected bond lengths [Å] and angles [°] for **3**

|          |          |               |            |
|----------|----------|---------------|------------|
| C1 – Zn1 | 1.969(3) | C1 – Zn1 – N1 | 128.35(13) |
| N1 – Zn1 | 1.973(3) | C1 – Zn1 – N3 | 122.99(13) |
| N3 – Zn1 | 1.991(2) | N1 – Zn1 – N3 | 107.59(10) |
| N2 – Zn2 | 2.001(2) | N2 – Zn2 – N4 | 109.68(10) |
| N4 – Zn2 | 1.982(3) | N2 – Zn2 – N5 | 107.94(11) |
| N5 – Zn2 | 1.978(3) | N2 – Zn2 – N7 | 109.80(11) |
| N7 – Zn2 | 1.989(3) | N4 – Zn2 – N5 | 113.14(11) |
| C3 – Zn3 | 1.965(3) | N4 – Zn2 – N7 | 106.91(11) |
| N6 – Zn3 | 2.000(2) | N5 – Zn2 – N7 | 109.36(10) |
| N8 – Zn3 | 1.980(3) | C3 – Zn3 – N6 | 124.19(13) |
| N1 – N2  | 1.381(3) | C3 – Zn3 – N8 | 128.10(13) |
| N3 – N4  | 1.391(3) | N6 – Zn3 – N8 | 106.99(10) |
| N5 – N6  | 1.390(3) |               |            |
| N7 – N8  | 1.390(3) |               |            |



*Crystal data and structure refinement for 4*

|                                   |                                             |                 |
|-----------------------------------|---------------------------------------------|-----------------|
| Empirical formula                 | $C_{26}H_{46.24}N_4Zn_2$                    |                 |
| Formula weight                    | 545.69                                      |                 |
| Temperature                       | 100(2) K                                    |                 |
| Wavelength                        | 0.71073 Å                                   |                 |
| Crystal system                    | Monoclinic                                  |                 |
| Space group                       | P 21/c                                      |                 |
| Unit cell dimensions              | a = 10.9820(15) Å                           | a = 90°         |
|                                   | b = 18.677(3) Å                             | b = 109.536(8)° |
|                                   | c = 14.857(2) Å                             | g = 90°         |
| Volume                            | 2871.9(7) Å <sup>3</sup>                    |                 |
| Z                                 | 4                                           |                 |
| Density (calculated)              | 1.262 Mg/m <sup>3</sup>                     |                 |
| Absorption coefficient            | 1.689 mm <sup>-1</sup>                      |                 |
| F(000)                            | 1161                                        |                 |
| Crystal size                      | 0.22 x 0.16 x 0.10 mm <sup>3</sup>          |                 |
| Theta range for data collection   | 2.250 to 25.414°.                           |                 |
| Index ranges                      | -12<=h<=12, -22<=k<=22, -9<=l<=17           |                 |
| Reflections collected             | 4642                                        |                 |
| Independent reflections           | 4642 [R(int) = 0.0563]                      |                 |
| Completeness to theta = 25.414°   | 88.7 %                                      |                 |
| Absorption correction             | Semi-empirical from equivalents             |                 |
| Max. and min. transmission        | 0.845 and 0.730                             |                 |
| Refinement method                 | Full-matrix least-squares on F <sup>2</sup> |                 |
| Data / restraints / parameters    | 4642 / 202 / 340                            |                 |
| Goodness-of-fit on F <sup>2</sup> | 1.141                                       |                 |
| Final R indices [I>2sigma(I)]     | R1 = 0.1877, wR2 = 0.4182                   |                 |
| R indices (all data)              | R1 = 0.2046, wR2 = 0.4252                   |                 |
| Largest diff. peak and hole       | 1.268 and -1.423 e.Å <sup>-3</sup>          |                 |

This compound crystallizes as twins. The ratio of the twin components being 0.721(11) : 0.279(11).

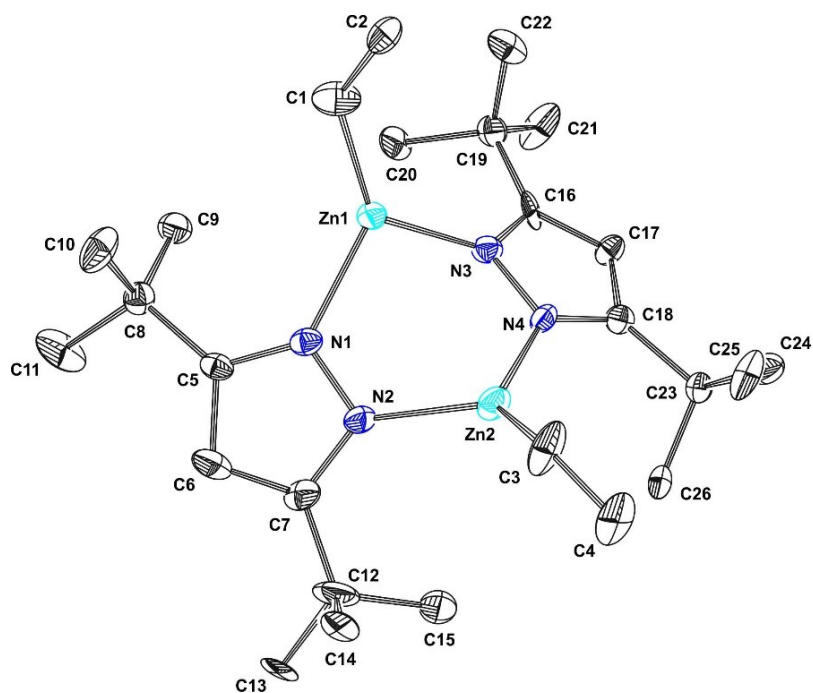

**Figure S4.** Molecular structure of **4** with thermal ellipsoids set at 35% probability. Hydrogen atoms have been omitted for clarity.

Due to the poor quality of the data bond lengths and angle parameters are not analyzed.

### Crystal data and structure refinement for 5

|                                   |                                             |               |
|-----------------------------------|---------------------------------------------|---------------|
| Empirical formula                 | $C_{64}H_{120}N_8O_3Zn_4$                   |               |
| Formula weight                    | 1311.15                                     |               |
| Temperature                       | 100(2) K                                    |               |
| Wavelength                        | 0.71073 Å                                   |               |
| Crystal system                    | Triclinic                                   |               |
| Space group                       | P 1                                         |               |
| Unit cell dimensions              | a = 11.89(2) Å                              | a = 72.50(6)° |
|                                   | b = 15.35(2) Å                              | b = 88.38(8)° |
|                                   | c = 22.38(5) Å                              | g = 69.64(3)° |
| Volume                            | 3639(11) Å <sup>3</sup>                     |               |
| Z                                 | 2                                           |               |
| Density (calculated)              | 1.197 Mg/m <sup>3</sup>                     |               |
| Absorption coefficient            | 1.347 mm <sup>-1</sup>                      |               |
| F(000)                            | 1408                                        |               |
| Crystal size                      | 0.19 x 0.17 x 0.09 mm <sup>3</sup>          |               |
| Theta range for data collection   | 1.49 to 25.698°.                            |               |
| Index ranges                      | -13<=h<=13, -17<=k<=17, -26<=l<=26          |               |
| Reflections collected             | 14273                                       |               |
| Independent reflections           | 12182 [R(int) = 0.0691]                     |               |
| Completeness to theta = 24.699°   | 98.6 %                                      |               |
| Absorption correction             | Semi-empirical from equivalents             |               |
| Max. and min. transmission        | 0.886 and 0.774                             |               |
| Refinement method                 | Full-matrix least-squares on F <sup>2</sup> |               |
| Data / restraints / parameters    | 12182 / 6 / 741                             |               |
| Goodness-of-fit on F <sup>2</sup> | 1.088                                       |               |
| Final R indices [I>2sigma(I)]     | R1 = 0.1088, wR2 = 0.3109                   |               |
| R indices (all data)              | R1 = 0.1387, wR2 = 0.3274                   |               |
| Largest diff. peak and hole       | 2.718 and -1.560 e.Å <sup>-3</sup>          |               |

This compound crystallizes as twins. The ratio of the twin components being 0.558(7) : 0.442(7).

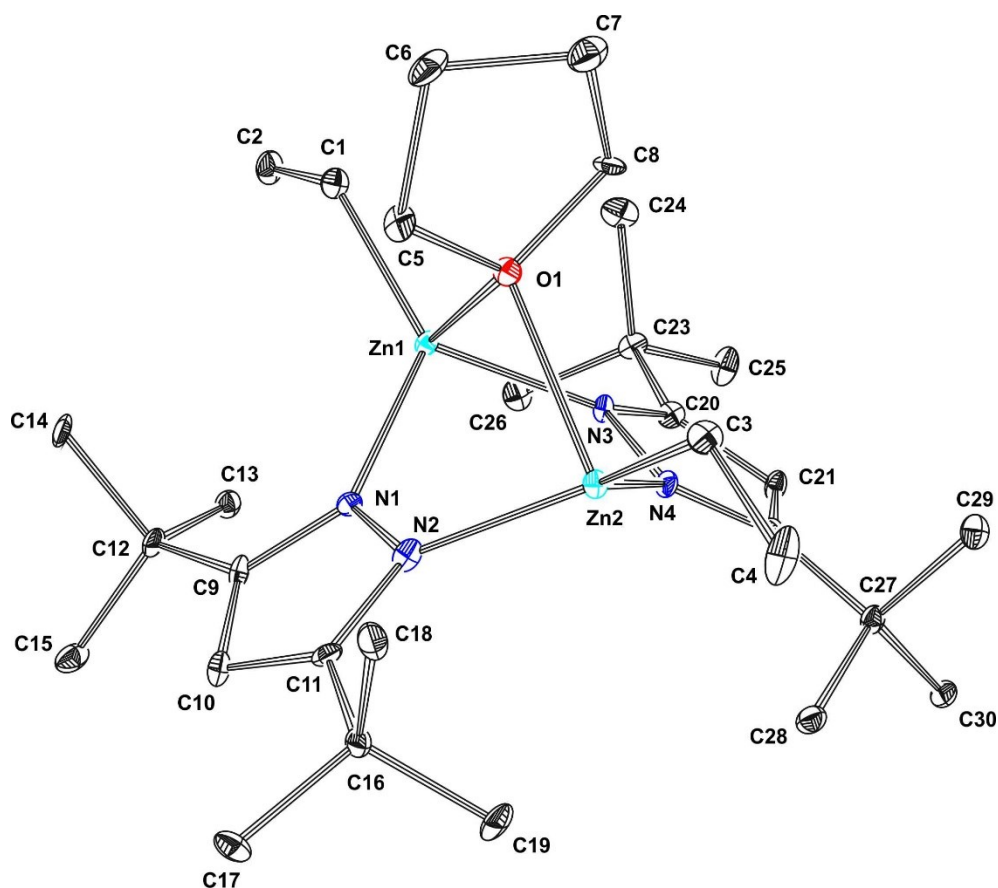

**Figure S5.** Molecular structure of **5** with thermal ellipsoids set at 35% probability. Hydrogen atoms have been omitted for clarity.

**Table S4.** Selected bond lengths [ $\text{\AA}$ ] and angles [ $^\circ$ ] for **5**

|          |           |               |          |
|----------|-----------|---------------|----------|
| C1 – Zn1 | 2.011(12) | O1 – Zn1 – N1 | 89.8(3)  |
| O1 – Zn1 | 2.297(8)  | O1 – Zn1 – N3 | 87.0(3)  |
| N1 – Zn1 | 2.039(9)  | C1 – Zn1 – N1 | 126.4(4) |
| N3 – Zn1 | 2.037(9)  | C1 – Zn1 – N3 | 133.8(4) |
| C3 – Zn2 | 2.000(11) | C1 – Zn1 – O1 | 96.1(4)  |
| O1 – Zn2 | 2.307(8)  | N1 – Zn1 – N3 | 99.5(4)  |
| N2 – Zn2 | 2.027(10) | O1 – Zn2 – N2 | 86.7(3)  |
| N4 – Zn2 | 2.042(9)  | O1 – Zn2 – N4 | 90.0(3)  |
| N1 – N2  | 1.406(12) | C3 – Zn2 – N2 | 133.9(4) |
| N3 – N4  | 1.402(12) | C3 – Zn2 – N4 | 126.0(4) |
|          |           | C3 – Zn2 – O1 | 96.7(4)  |
|          |           | N2 – Zn2 – N4 | 99.9(4)  |

### Crystal data and structure refinement for **6**

|                                         |                                                                    |                        |
|-----------------------------------------|--------------------------------------------------------------------|------------------------|
| Empirical formula                       | $C_{26}H_{36}N_4O_2Zn_2$                                           |                        |
| Formula weight                          | 567.39                                                             |                        |
| Temperature                             | 100.01(10) K                                                       |                        |
| Wavelength                              | 0.71073 Å                                                          |                        |
| Crystal system                          | Monoclinic                                                         |                        |
| Space group                             | $C 1 2/c 1$                                                        |                        |
| Unit cell dimensions                    | $a = 12.2907(9)$ Å                                                 | $a = 90^\circ$         |
|                                         | $b = 16.3872(10)$ Å                                                | $b = 109.417(8)^\circ$ |
|                                         | $c = 13.4133(11)$ Å                                                | $g = 90^\circ$         |
| Volume                                  | $2547.9(3)$ Å <sup>3</sup>                                         |                        |
| Z                                       | 4                                                                  |                        |
| Density (calculated)                    | $1.4790$ Mg/m <sup>3</sup>                                         |                        |
| Absorption coefficient                  | $1.913$ mm <sup>-1</sup>                                           |                        |
| F(000)                                  | 1186.8169                                                          |                        |
| Crystal size                            | $0.32 \times 0.24 \times 0.12$ mm <sup>3</sup>                     |                        |
| Theta range for data collection         | $3.22$ to $27.00^\circ$                                            |                        |
| Index ranges                            | $-15 \leq h \leq 15$ , $-21 \leq k \leq 11$ , $-14 \leq l \leq 16$ |                        |
| Reflections collected                   | 5259                                                               |                        |
| Independent reflections                 | 2737 [R(int) = 0.0454]                                             |                        |
| Completeness to theta = $26.9978^\circ$ | 98.35 %                                                            |                        |
| Absorption correction                   | Semi-empirical from equivalents                                    |                        |
| Max. and min. transmission              | 0.795 and 0.582                                                    |                        |
| Refinement method                       | Full-matrix least-squares on F <sup>2</sup>                        |                        |
| Data / restraints / parameters          | 2737 / 0 / 155                                                     |                        |
| Goodness-of-fit on F <sup>2</sup>       | 1.0447                                                             |                        |
| Final R indices [I > 2σ(I)]             | R1 = 0.0564, wR2 = 0.1447                                          |                        |
| R indices (all data)                    | R1 = 0.0653, wR2 = 0.1602                                          |                        |
| Largest diff. peak and hole             | $1.5187$ and $-0.8272$ e.Å <sup>-3</sup>                           |                        |

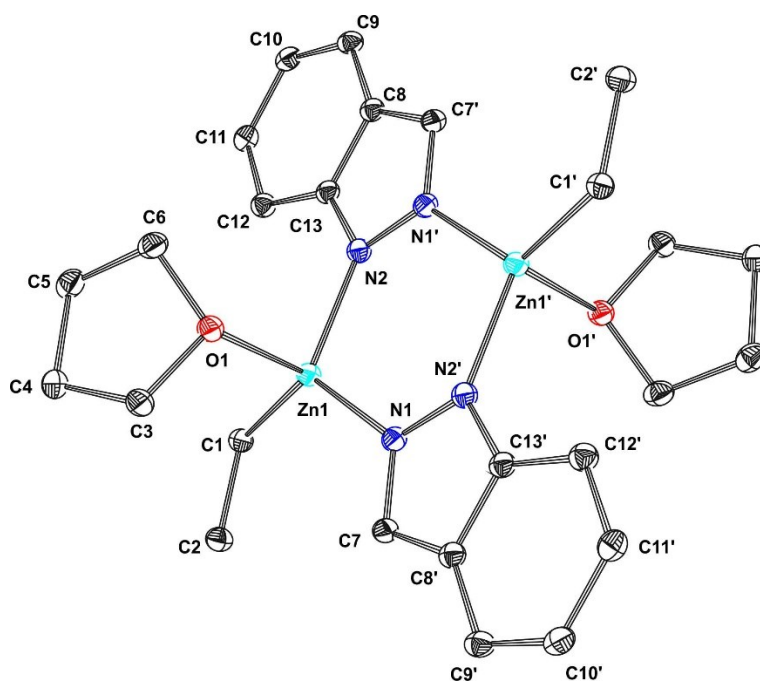

**Figure S6.** Molecular structure of **6** with thermal ellipsoids set at 35% probability. Hydrogen atoms have been omitted for clarity. Symmetry transformations used to generate equivalent atoms:  $(-x+3/2, -y+1/2, -z)$ .

**Table S5.** Selected bond lengths [Å] and angles [°] for **6**

|          |          |               |            |
|----------|----------|---------------|------------|
| C1 – Zn1 | 1.981(3) | O1 – Zn1 – N1 | 90.69(10)  |
| O1 – Zn1 | 2.220(2) | O1 – Zn1 – N2 | 94.28(10)  |
| N1 – Zn1 | 2.025(3) | C1 – Zn1 – N1 | 122.90(13) |
| N2 – Zn1 | 1.996(3) | C1 – Zn1 – N2 | 123.34(13) |
| N1 – N2' | 1.373(4) | C1 – Zn1 – O1 | 109.31(12) |
|          |          | N1 – Zn1 – N2 | 106.86(11) |

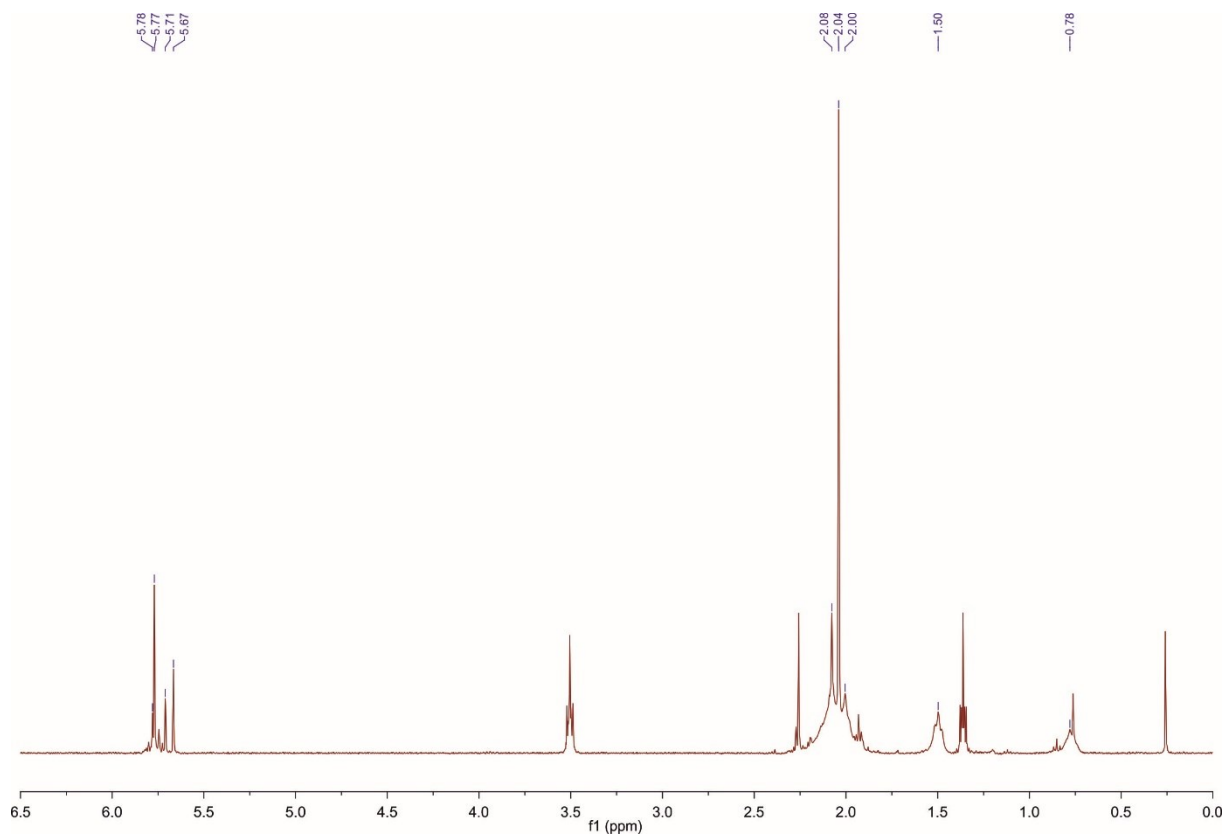

**Figure S7.** <sup>1</sup>H NMR spectrum of compound **1** (C<sub>6</sub>D<sub>6</sub>).

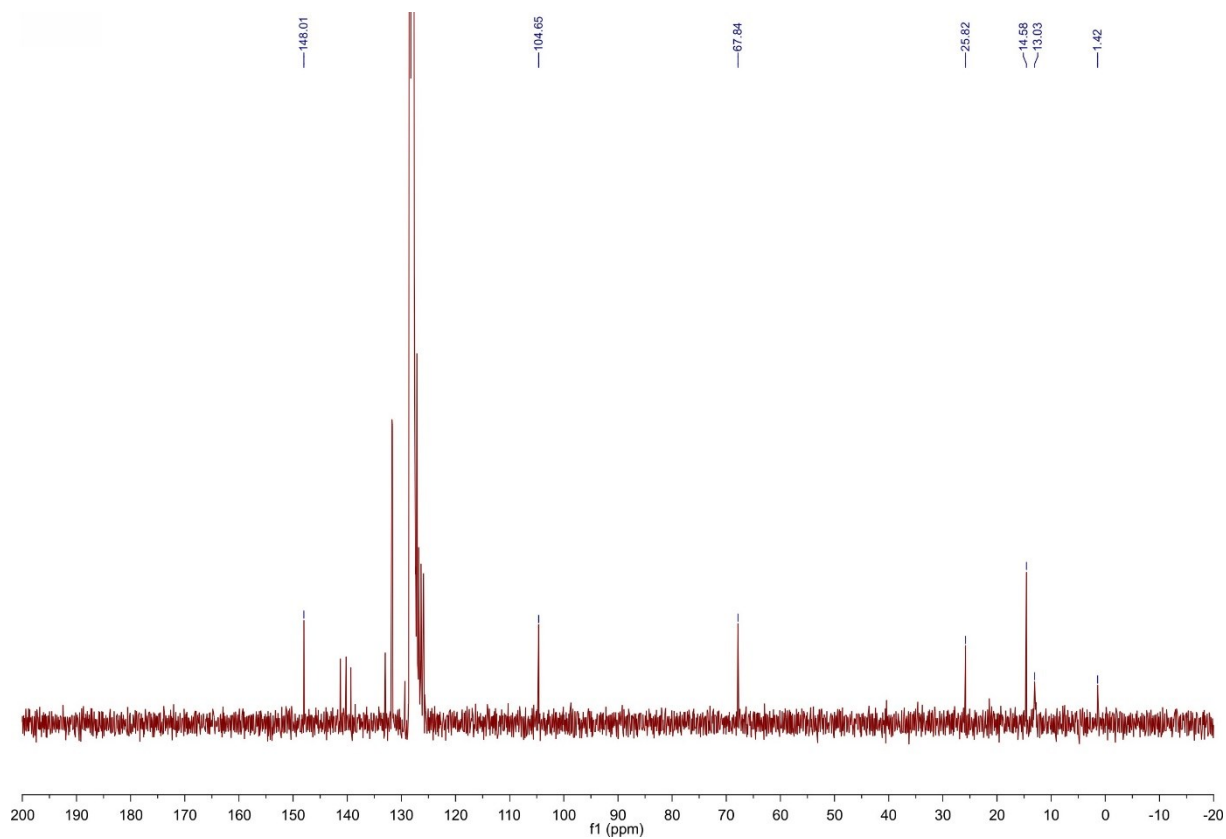

**Figure S8.** <sup>13</sup>C NMR spectrum of compound **1** (C<sub>6</sub>D<sub>6</sub>).

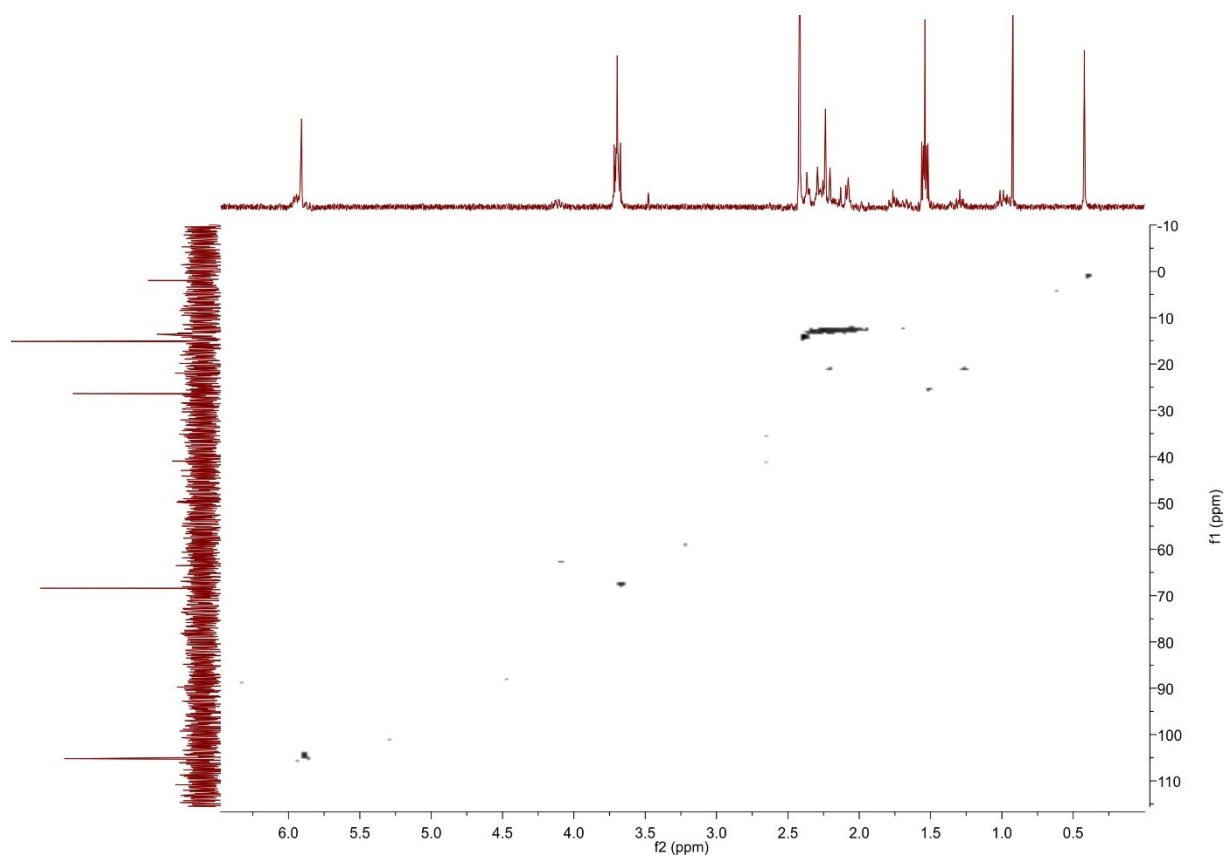

**Figure S9.** HMQC NMR spectrum of **1** ( $C_6D_6$ ).

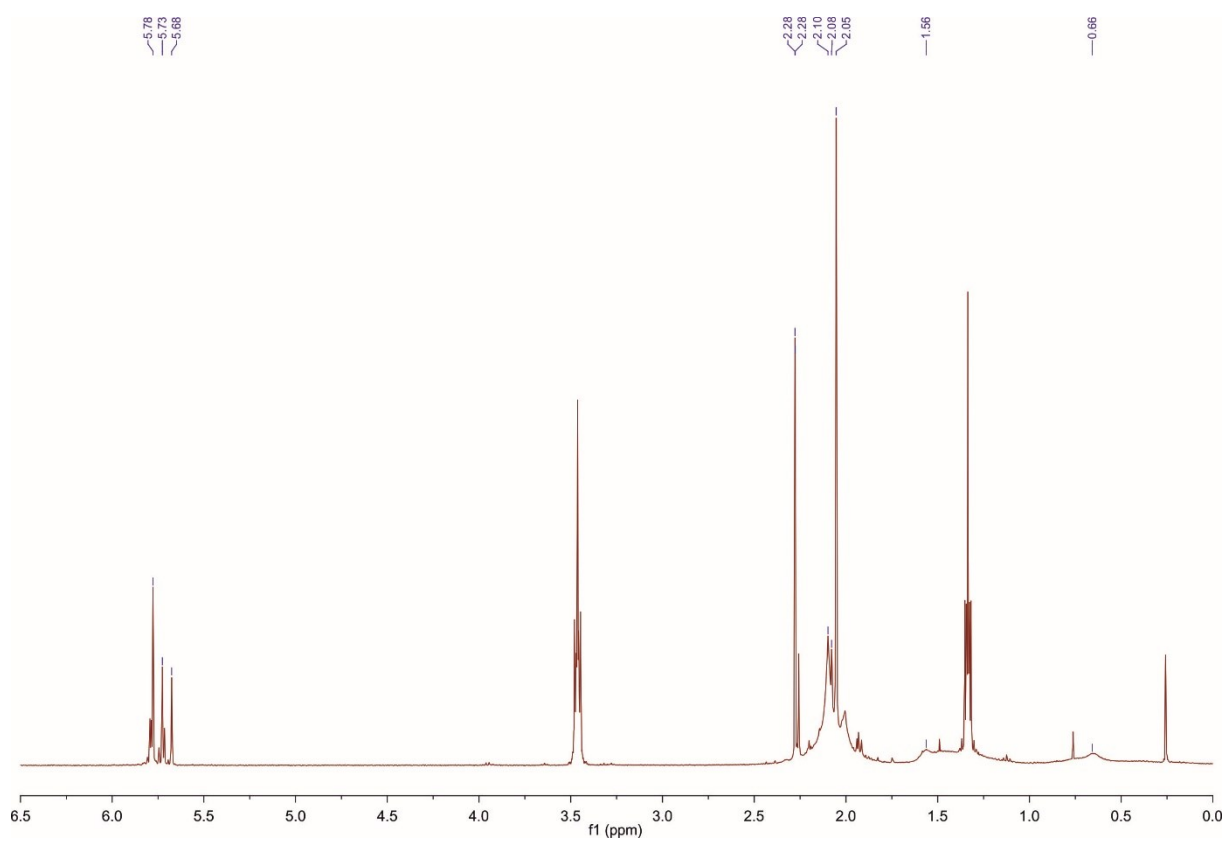

**Figure S10.**  $^1H$  NMR spectrum of compound **2** ( $C_6D_6$ ).



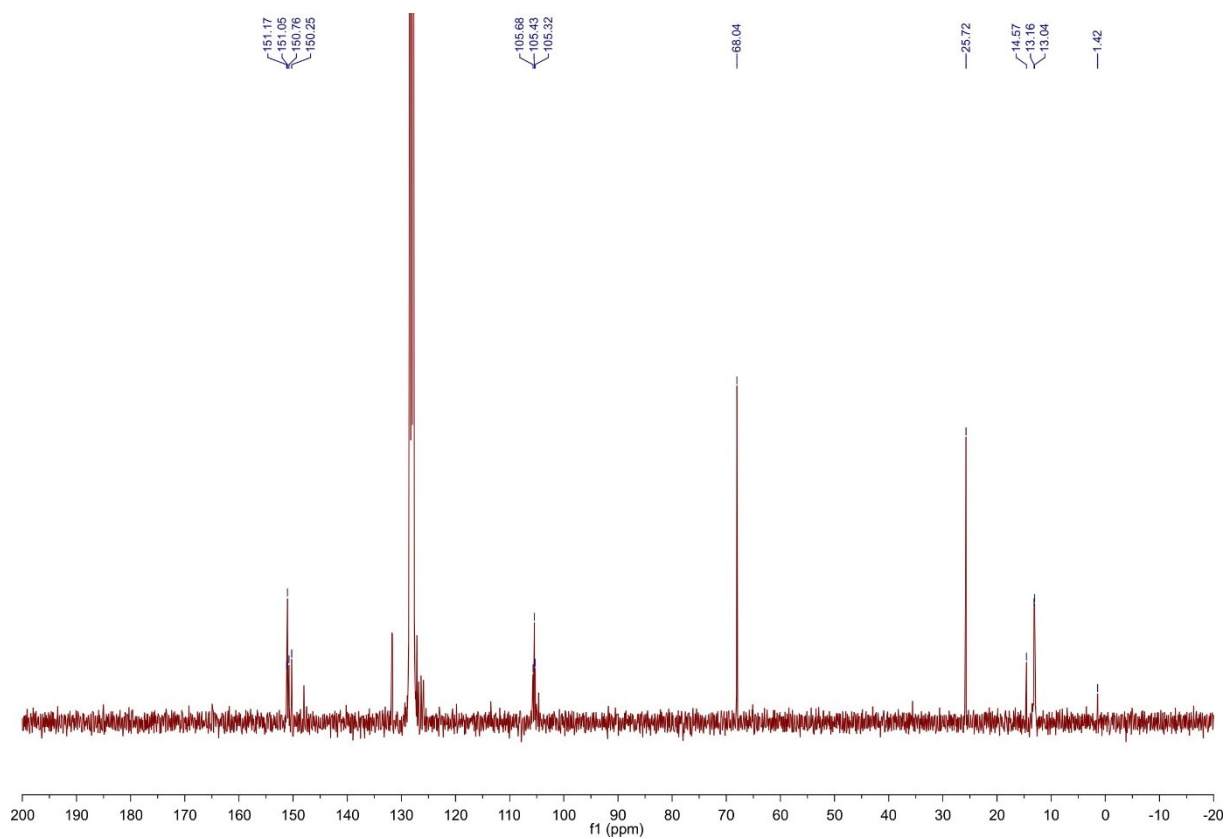

**Figure S11.** <sup>13</sup>C NMR spectrum of compound **2** (C<sub>6</sub>D<sub>6</sub>).

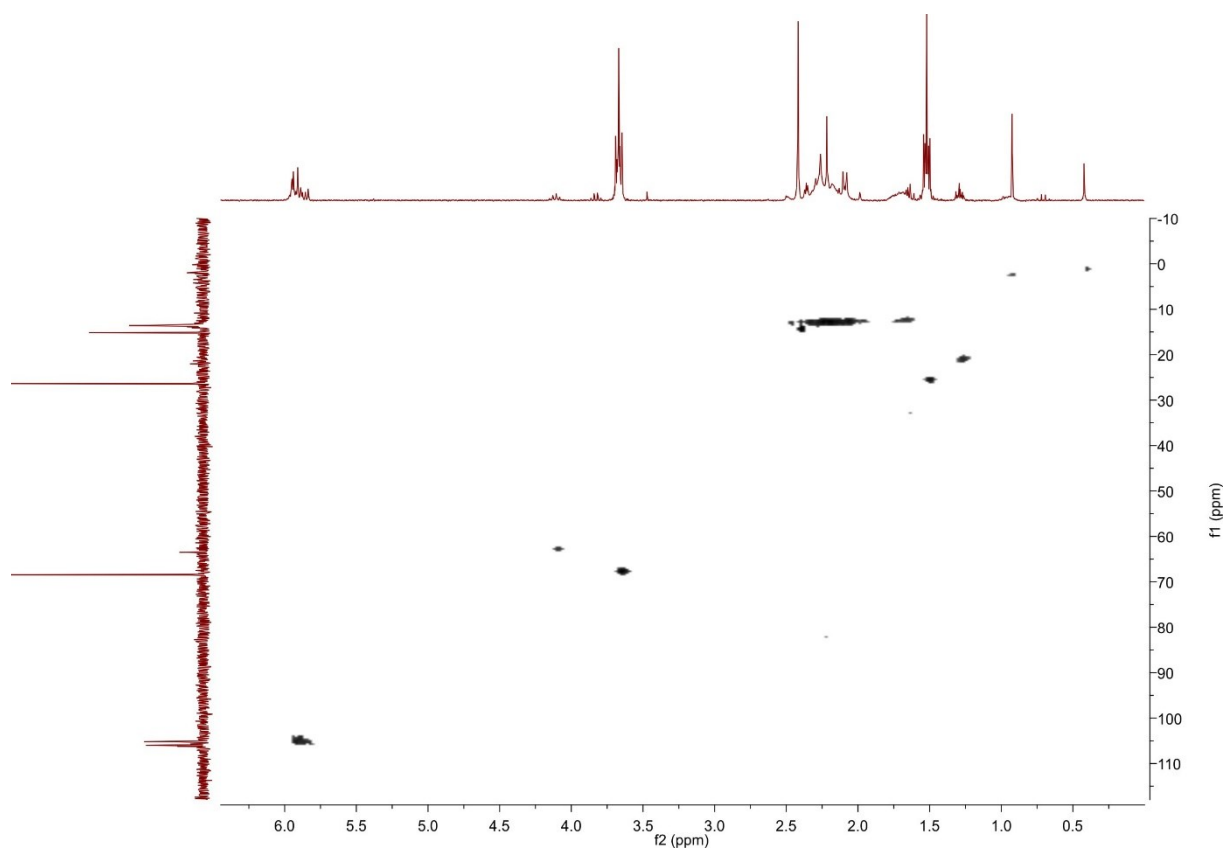

**Figure S12.** HMQC NMR spectrum of **2** (C<sub>6</sub>D<sub>6</sub>).

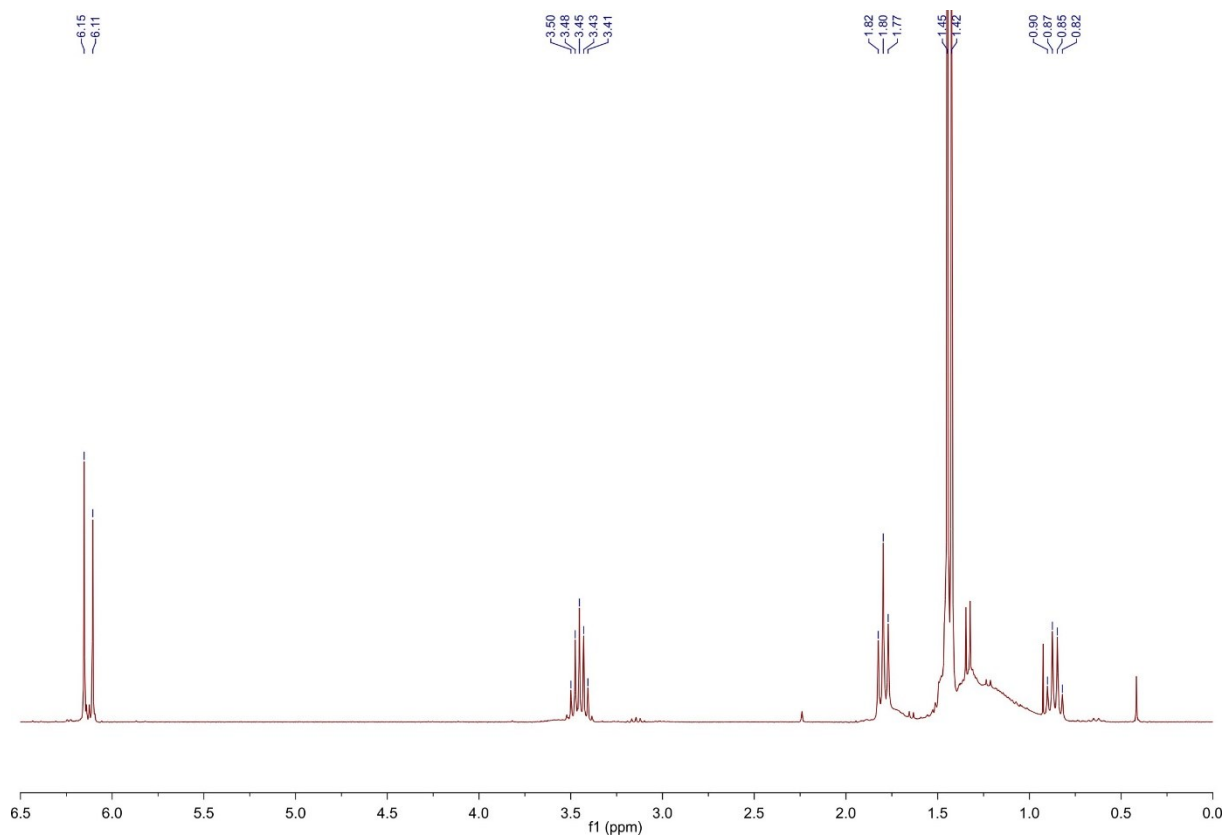

Figure S13.  $^1\text{H}$  NMR spectrum of compound **3** ( $\text{C}_6\text{D}_6$ ).

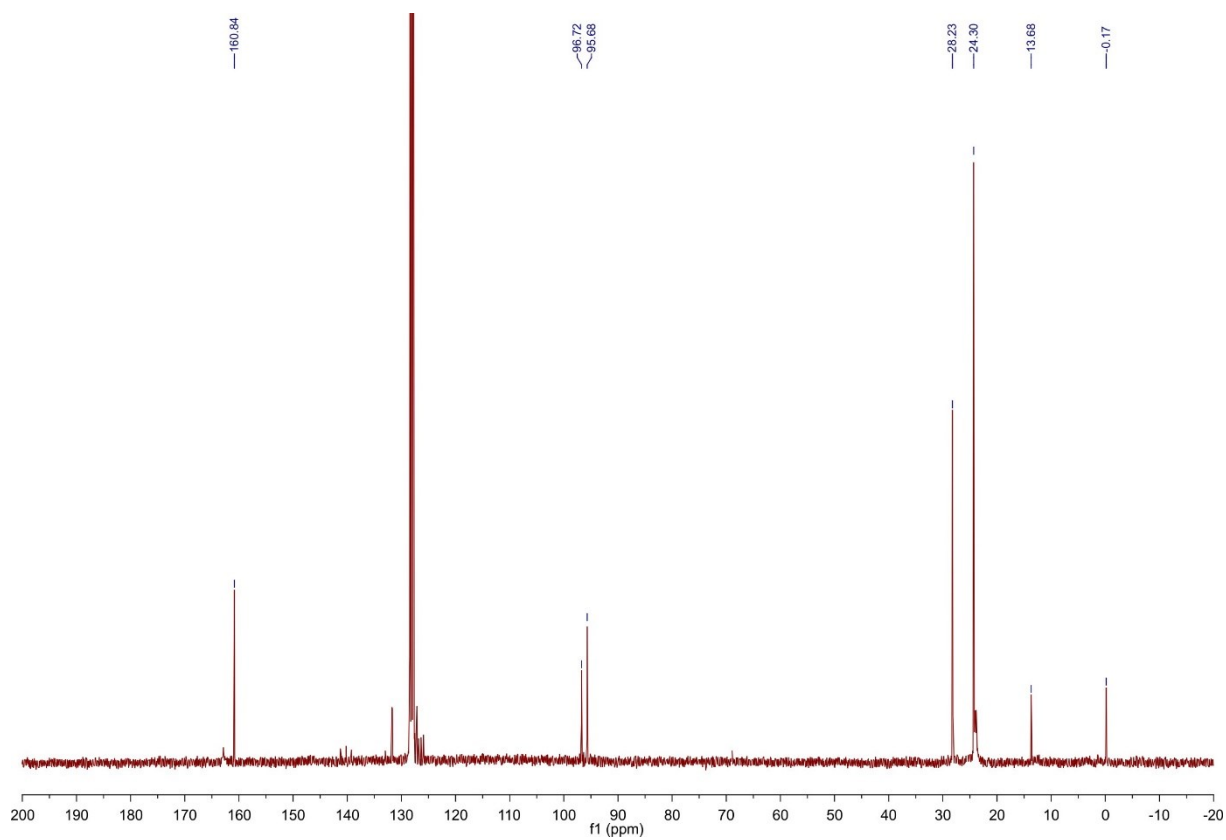

Figure S14.  $^{13}\text{C}$  NMR spectrum of compound **3** ( $\text{C}_6\text{D}_6$ ).

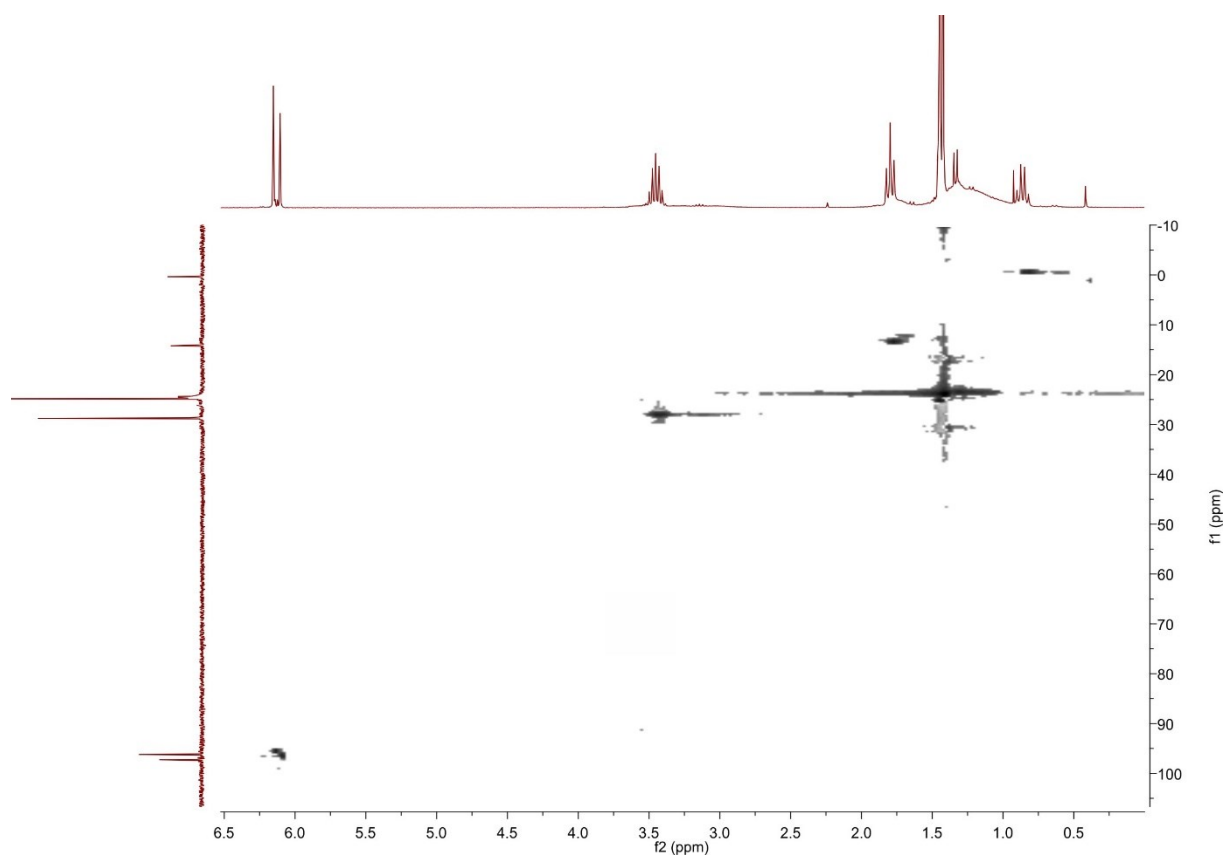

**Figure S15.** HMOC NMR spectrum of **3** ( $C_6D_6$ )

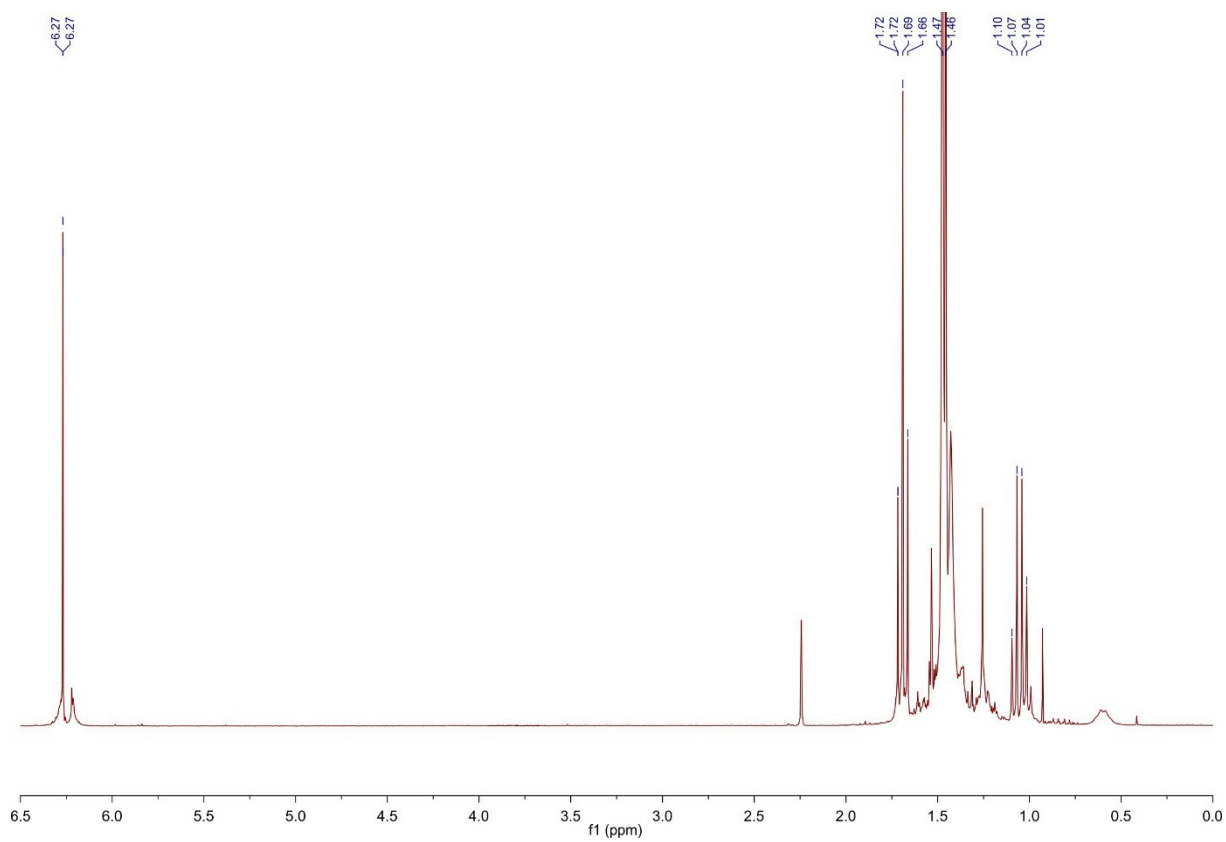

**Figure S16.**  $^1H$  NMR spectrum of compound **4** ( $C_6D_6$ ).

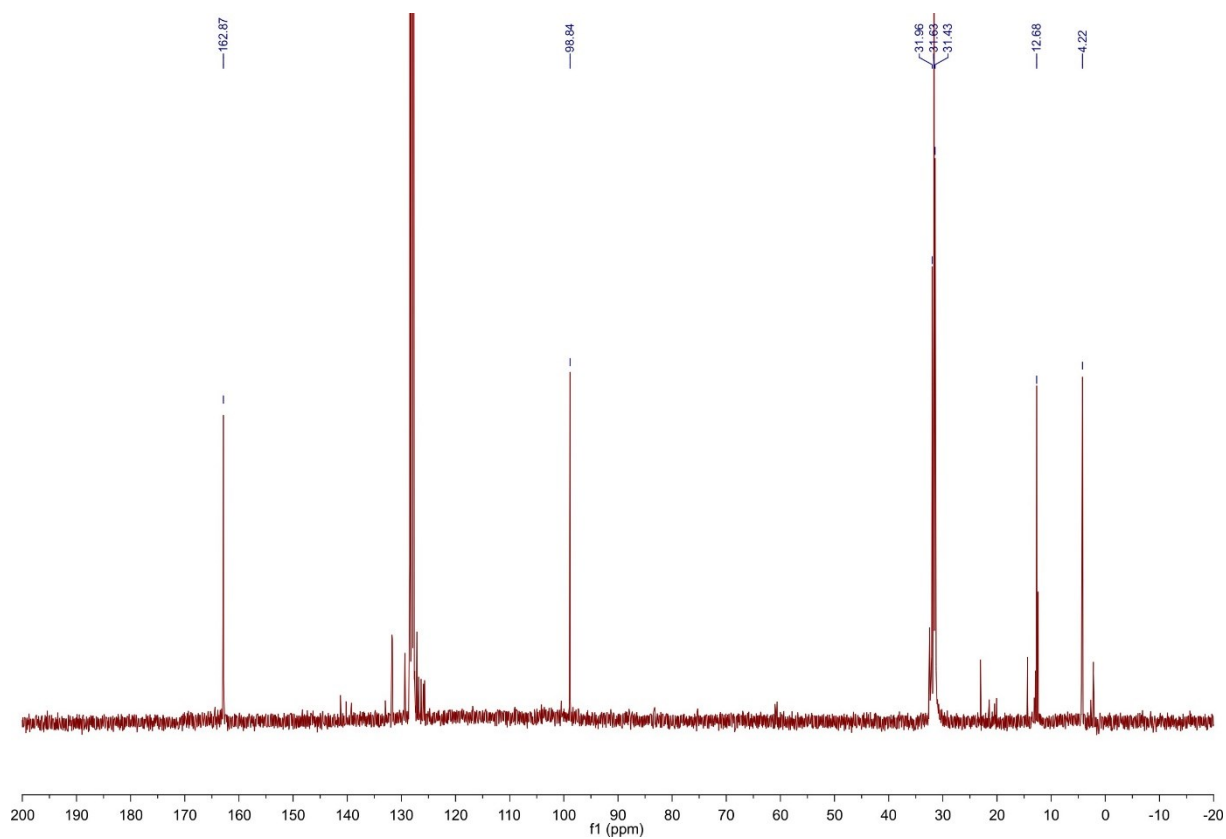

Figure S17.  $^{13}\text{C}$  NMR spectrum of compound **4** ( $\text{C}_6\text{D}_6$ ).

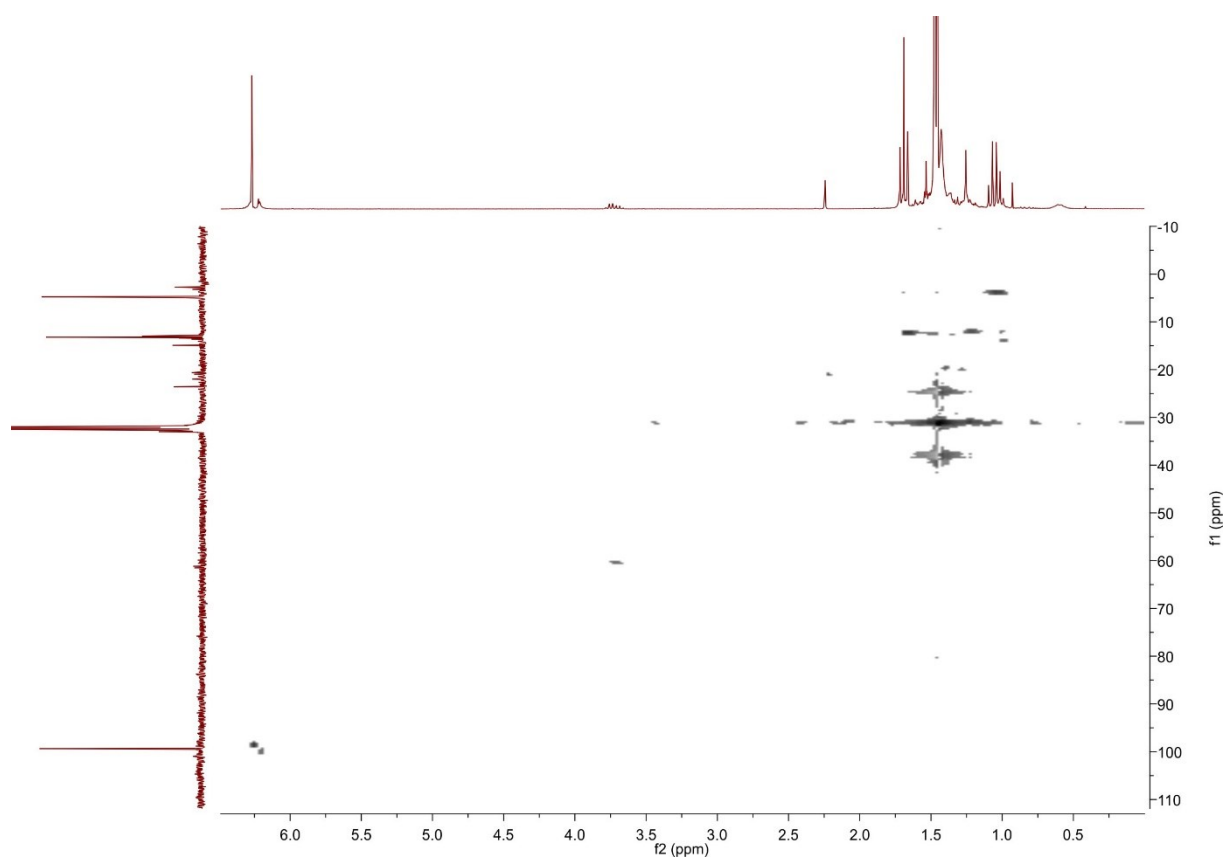

Figure S18. HMQC NMR spectrum of **4** ( $\text{C}_6\text{D}_6$ )

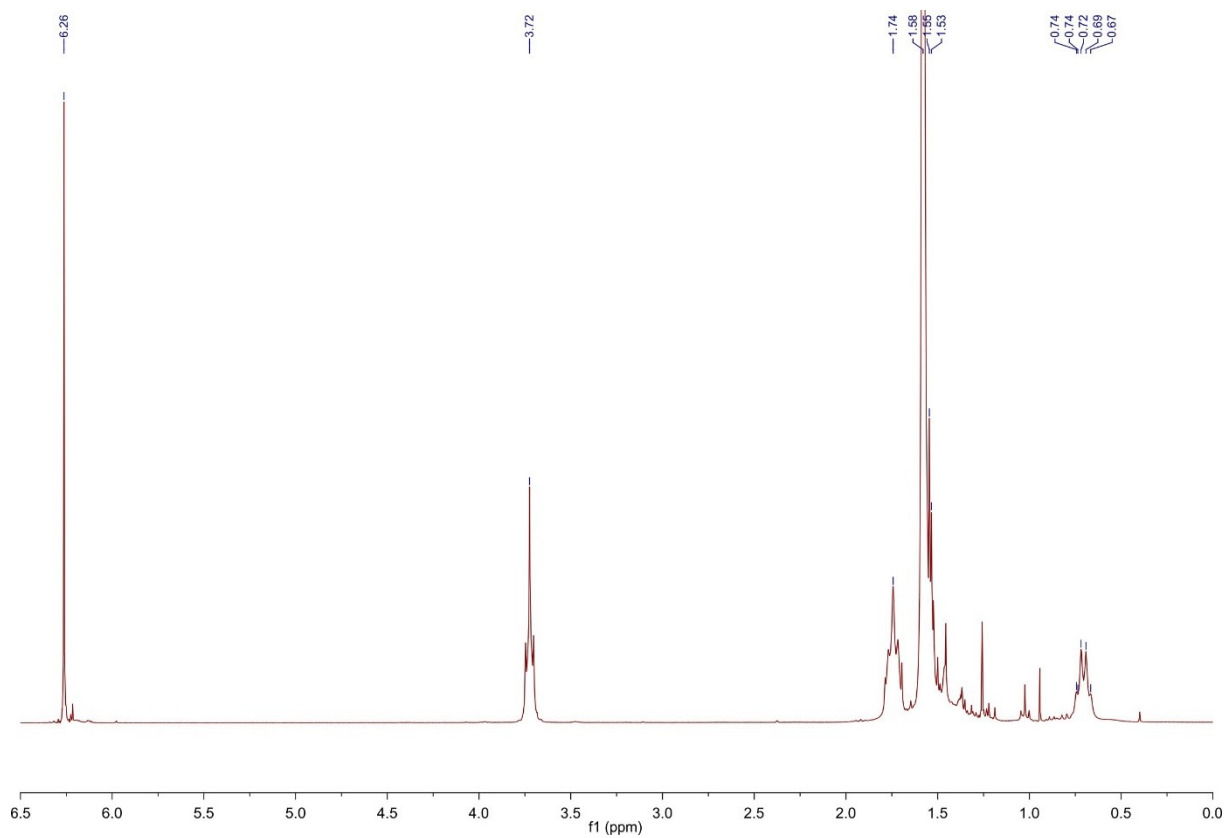

**Figure S19.**  $^1\text{H}$  NMR spectrum of compound **5** ( $\text{C}_6\text{D}_6$ ).

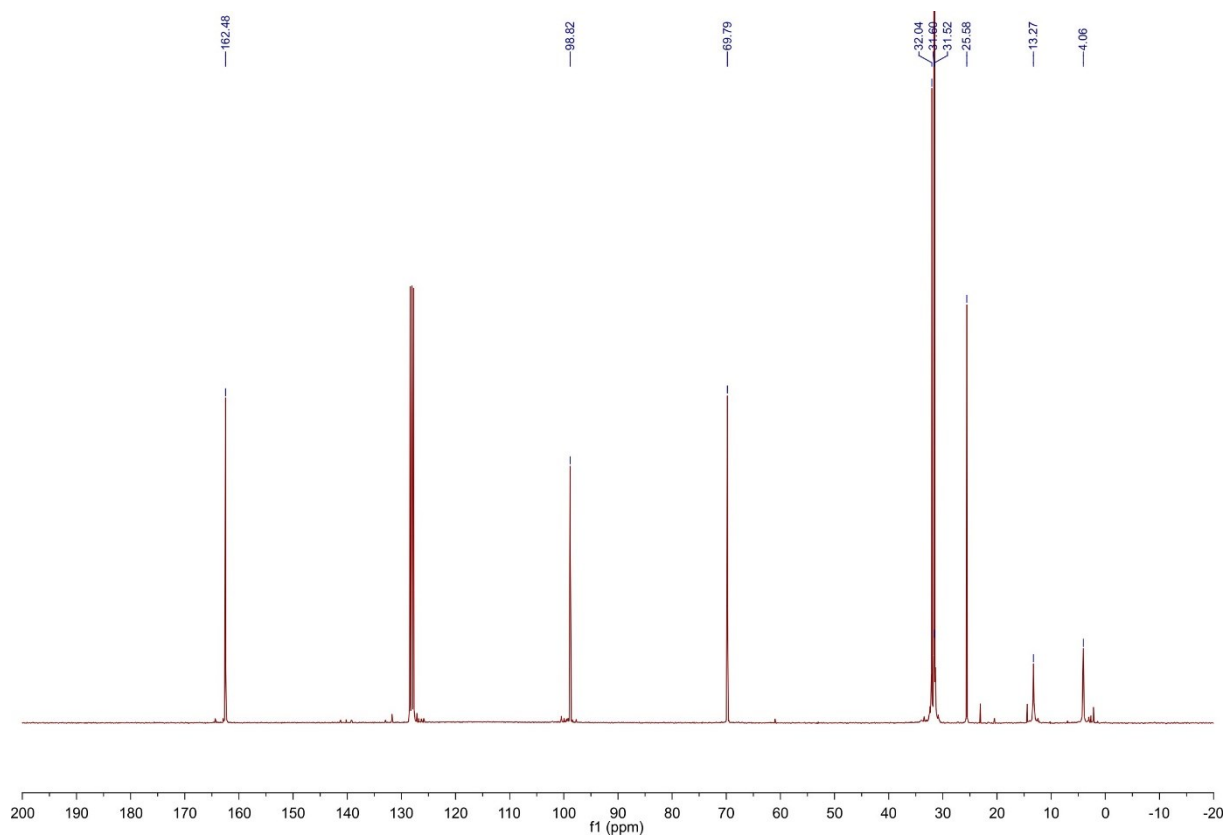

**Figure S20.**  $^{13}\text{C}$  NMR spectrum of compound **5** ( $\text{C}_6\text{D}_6$ ).

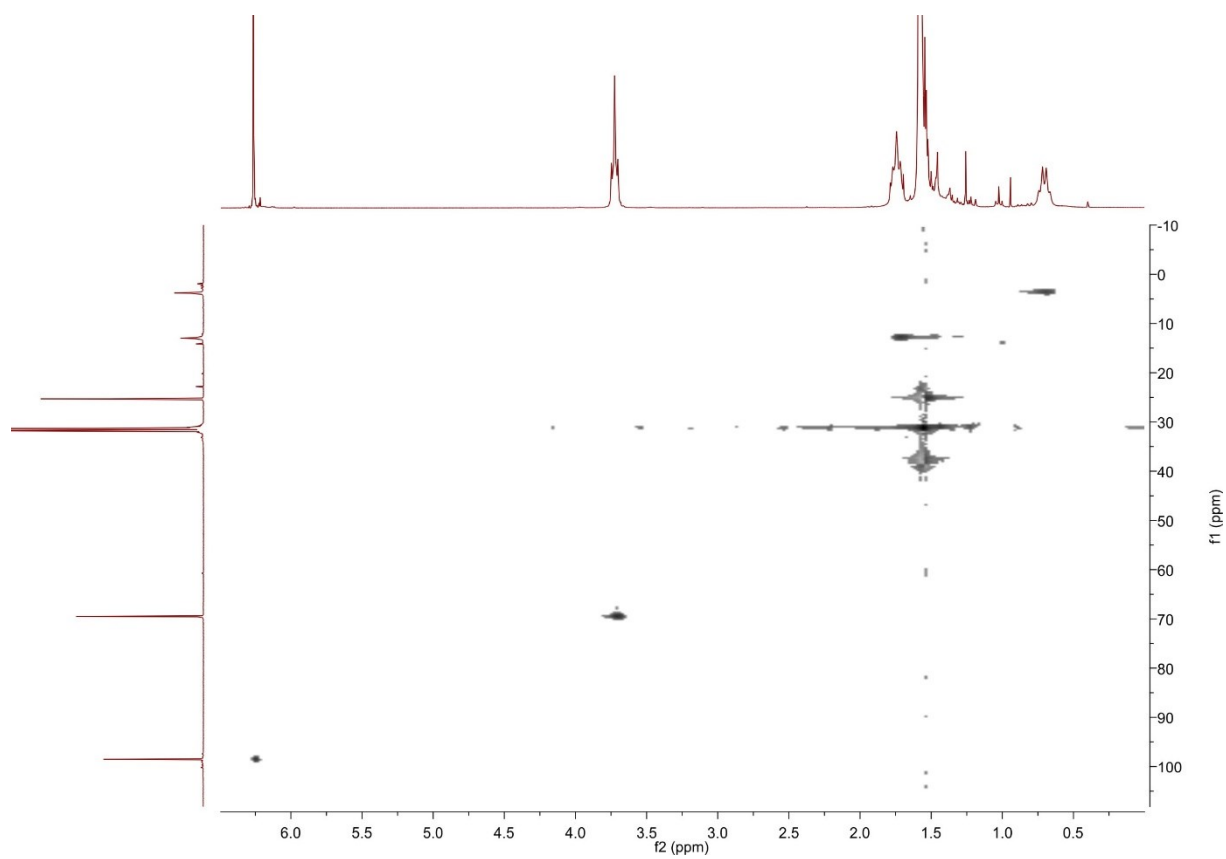

Figure S21. HMBC NMR spectrum of **5** ( $C_6D_6$ )

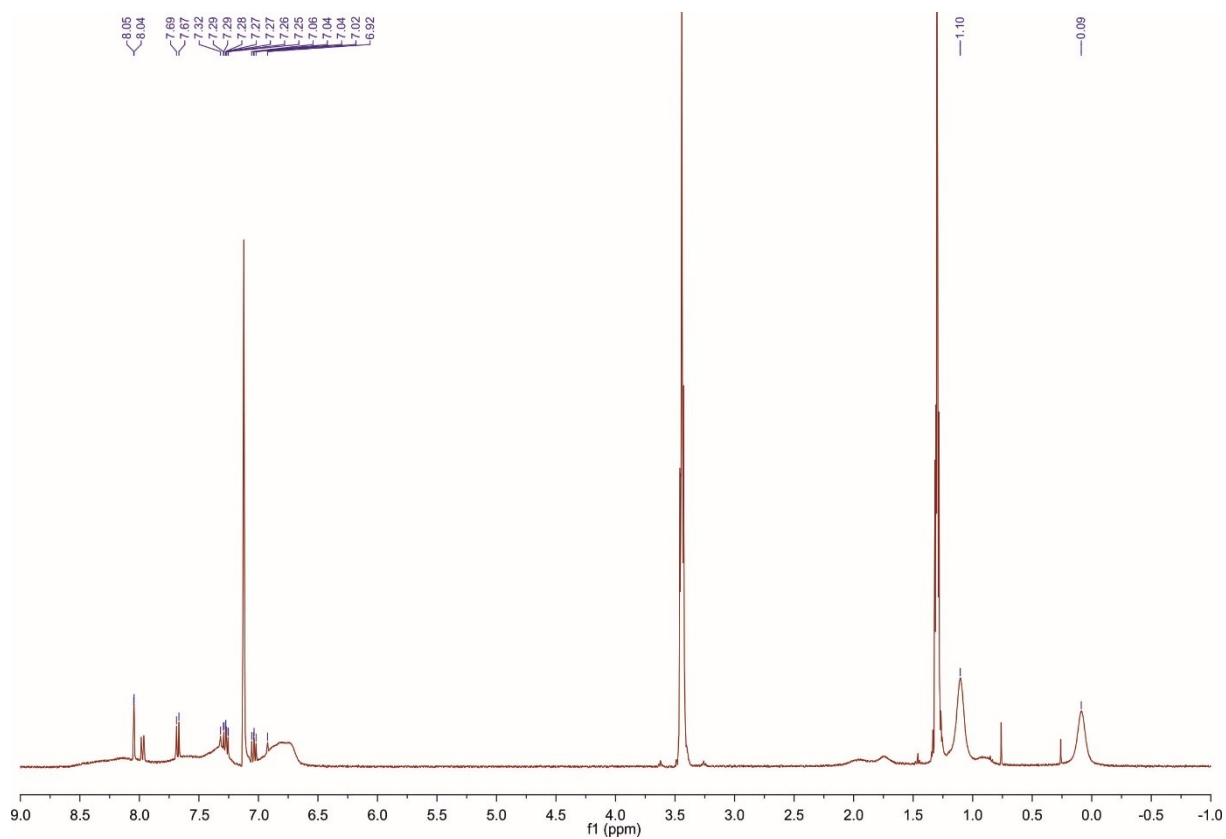

Figure S22.  $^1H$  NMR spectrum of compound **6** ( $C_6D_6$ ).

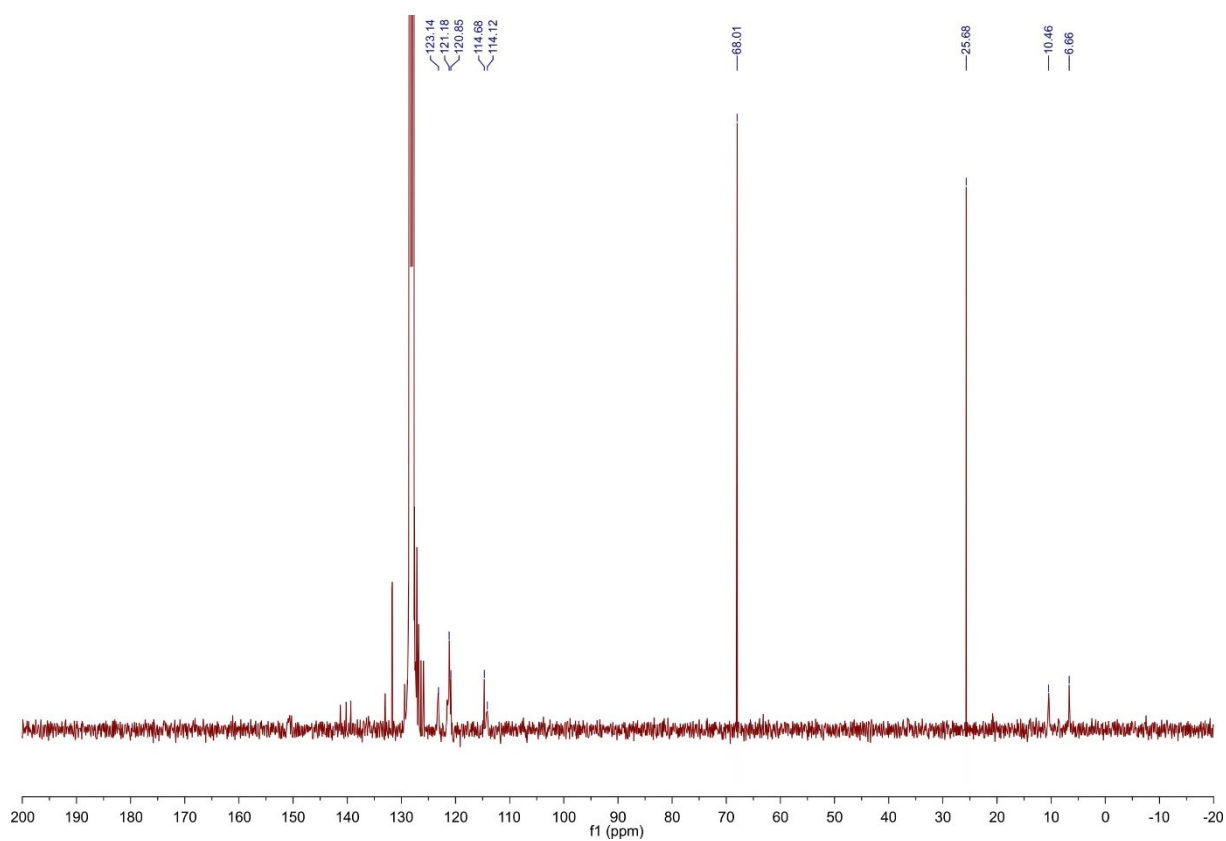

Figure S23. <sup>13</sup>C NMR spectrum of compound **6** (C<sub>6</sub>D<sub>6</sub>).

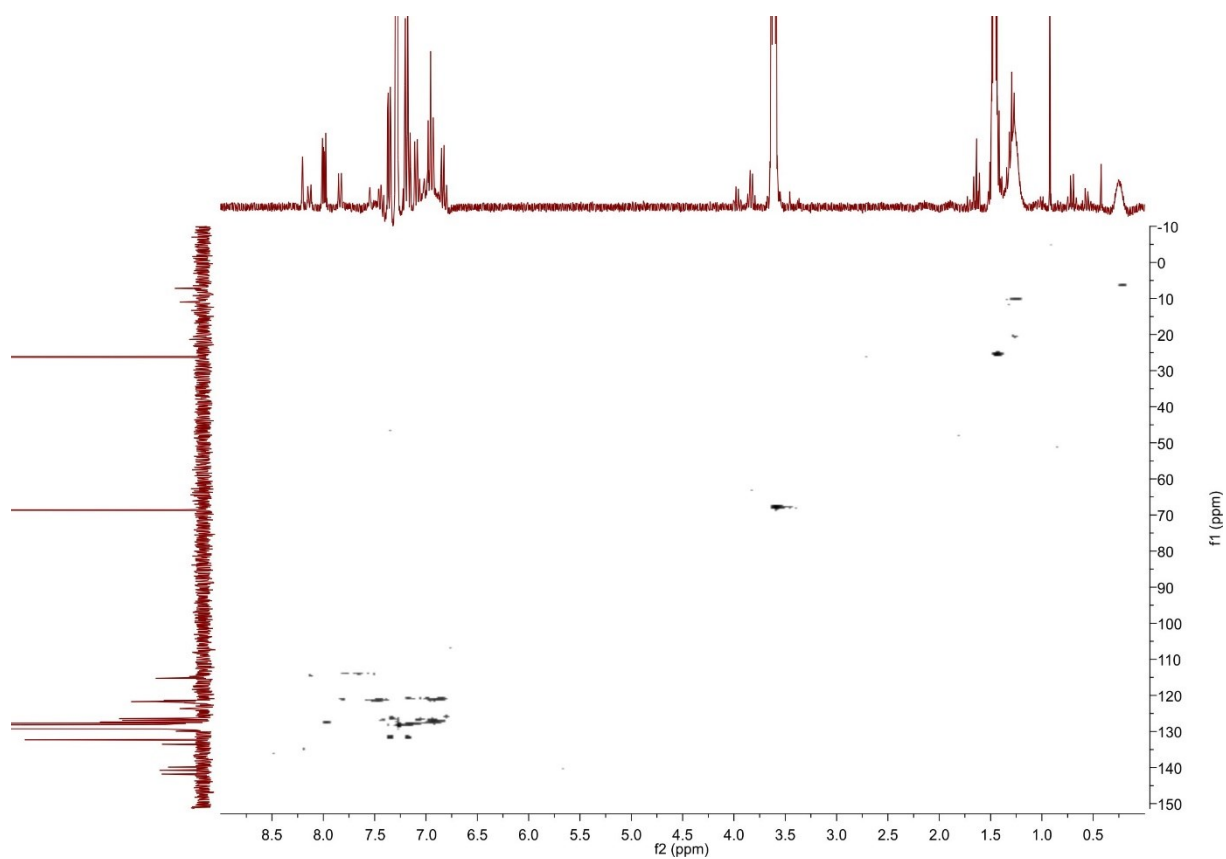

Figure S24. HMQC NMR spectrum of **6** (C<sub>6</sub>D<sub>6</sub>)

## DOSY NMR data processing description

All of the DOSY NMR data processing and analysis was conducted in accordance to the literature reports concerning the usage of the calibration curves of the inert internal standard molecule (1,2,3,4-tetraphenylnaphthalene (TPhN) was selected) in order to accurately determine the molecular weight of the analyte.<sup>4</sup> Moreover, we have applied the van-der-Waals radii-based correction in order to account for the underestimation of MW due to the presence of heavy atoms, according to the literature methods.<sup>5</sup>

Initially the diffusion coefficients (D) of the TPhN reference were identified and averaged. Then for every signal originated from the analyte the normalised diffusion ( $D_{\text{norm}}$ ) coefficient was calculated based on the literature data, followed by the calculation of the molecular weight ( $MW_{\text{det}}$ ) using the external DSE (Dissipated Spheres + Ellipsoids) calibration curve.<sup>4</sup>

The van-der-Waals radii-based correction have been applied to the obtained  $MW_{\text{det}}$  values following the procedures described in the literature.<sup>5</sup> Initially the potential candidate structures were selected and their Molar van-der-Waals Density  $MD_w$  have been calculated. Next the correction factor has been calculated using the calibration curve determined in the previous literature report,<sup>5</sup> which allowed for calculation of the corrected molecular weight values ( $MW_{\text{det,corr}}$ ).

The example data illustrating the procedure are provided in Table S1 (for sample DOSY-2).

**Table S6.** DOSY NMR data processing for sample DOSY-2.

| No. | ppm range |       | D [ $\text{m}^2/\text{s}$ ] | log $D_{\text{norm}}$ | $MW_{\text{det}}$ [ $\text{g mol}^{-1}$ ] | comments                   |
|-----|-----------|-------|-----------------------------|-----------------------|-------------------------------------------|----------------------------|
| 1   | 7.898     | 7.825 | 6.509E-10                   | -                     | -                                         | TPhN reference             |
| 2   | 7.277     | 7.202 | 6.277E-10                   | -                     | -                                         | TPhN reference             |
| 3   | 7.093     | 7.014 | 6.398E-10                   | -                     | -                                         | TPhN reference             |
| 4   | 7.004     | 6.930 | 6.723E-10                   | -                     | -                                         | TPhN reference             |
| 5   | 6.879     | 6.787 | 6.443E-10                   | -                     | -                                         | TPhN reference             |
| 6   | 6.738     | 6.659 | 6.478E-10                   | -                     | -                                         | TPhN reference             |
| 7   | 3.394     | 3.251 | 6.479E-10                   | -9.166                | 502                                       | $\text{CHCH}_3$ (pyrazole) |
| 8   | 1.739     | 1.619 | 6.599E-10                   | -9.158                | 487                                       | $\text{CH}_2\text{CH}_3$   |
| 9   | 1.338     | 1.284 | 6.708E-10                   | -9.151                | 474                                       | $\text{CHCH}_3$ (pyrazole) |
| 10  | 0.807     | 0.669 | 6.688E-10                   | -9.153                | 476                                       | $\text{CH}_2\text{CH}_3$   |



## References

---

- 1 Agilent Technologies, *CrysAlisPro*, Version 1.171.35.21b
- 2 Z. Otwinowski, W. Minor, *Methods Enzymol.* 1997, **276**, 307-326.
- 3 Sheldrick, G. M., *Acta Cryst.* 2008, **64A**, 112-122.
- 4 R. Neufeld and D. Stalke, *Chem. Sci.*, 2015, **6**, 3354–3364.
- 5 A. K. Kreyenschmidt, S. Bachmann, T. Niklas and D. Stalke, *ChemistrySelect*, 2017, **2**, 6957–6960.
